# Supplementary figures and images for: [Ru(phen)2podppz]2+ significantly inhibits glioblastoma growth in vitro and vivo with fewer side-effects than cisplatin
Source: Royal Society of Chemistry journal article supplement (doi:10.1039/d0dt01877e), 2020-01-01

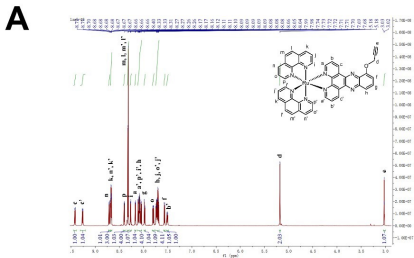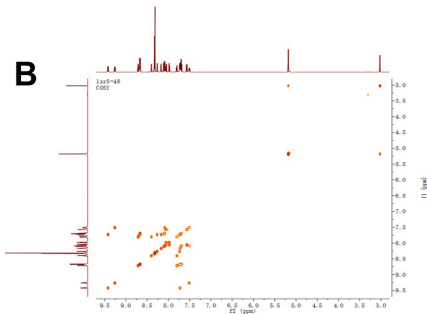

Supplement: d0dt01877e2.pdf [file d0dt01877e2.pdf]
